# Supplementary material for: Association Between Caregiver Strain and Self-Care Among Caregivers With Diabetes
Source: PubMed Central journal article supplement (PMC7879235; doi:10.1001/jamanetworkopen.2020.36676), 2021-02-11
Supplement: jamanetwopen-e2036676-s001.pdf [file jamanetwopen-e2036676-s001.pdf]

## Supplementary Online Content

King A, Bryan Ringel JB, Safford MM, et al. Association between caregiver strain and self-care among caregivers with diabetes. *JAMA Netw Open*. 2021;4(2): e2036676. doi: 10.1001/jamanetworkopen.2020.36676

**eTable 1.** Association Between Caregiver Strain and Diabetes Self-Care Domains: Interactions by Race and Gender

**eTable 2.** Effect of Caregiver Strain on Smoking Status among 793 REGARDS Participants, Stratified by Race

This supplementary material has been provided by the authors to give readers additional information about their work.

**eTable 1. Association Between Caregiver Strain and Diabetes Self-Care Domains: Interactions by Race and Gender**

| Self-Care Behaviors      | Gender                       |                               | Race                         |                               |
|--------------------------|------------------------------|-------------------------------|------------------------------|-------------------------------|
|                          | Unadjusted P for interaction | Full Model* P for interaction | Unadjusted P for interaction | Full Model* P for interaction |
| Physical Activity        | 0.56                         | 0.46                          | 0.96                         | 0.99                          |
| Mediterranean diet       | 0.20                         | 0.24                          | 0.51                         | 0.52                          |
| Smoking                  | 0.17                         | 0.14                          | <b>0.02*</b>                 | <b>0.01*</b>                  |
| Medication adherence     | 0.79                         | 0.90                          | 0.23                         | 0.36                          |
| Diabetes self-care score | 0.50                         | 0.32                          | 0.60                         | 0.49                          |

\*Fully Adjusted Model: Sociodemographic Data + Medical Conditions + Social Support + Caregiver Strain Data + Hours spent caregiving + Mental health (SF-12, MCS), Depressive symptoms (CES-D4) and Perceived Stress (PSS)

**eTable 2. Effect of Caregiver Strain on Smoking Status among 793 REGARDs Participants, Stratified by Race**

| Caregiver strain             | Unadjusted<br>PR (95% CI) | Fully Adjusted*<br>PR (95% CI) |
|------------------------------|---------------------------|--------------------------------|
| <i>White (n = 343)</i>       |                           |                                |
| <i>Not Currently smoking</i> |                           |                                |
| No strain                    | REF                       | REF                            |
| Some strain                  | 0.92 [0.85,0.99]          | 0.94 [0.87,1.02]               |
| High Strain                  | 0.92 [0.83,1.03]          | 0.94 [0.83,1.08]               |
| <i>Black (n = 450)</i>       |                           |                                |
| <i>Not Currently smoking</i> |                           |                                |
| No strain                    | REF                       | REF                            |
| Some strain                  | 1.08 [0.99,1.18]          | 1.08 [0.98,1.18]               |
| High Strain                  | 1.05 [0.93,1.17]          | 1.06 [0.94,1.20]               |

Abbreviations: PR - Prevalence Ratio; CI- Confidence Interval

\*Fully Adjusted Model: Sociodemographic Data + Medical Conditions + Social Support + Caregiver Strain Data + Hours Spent caregiving + Mental health (SF-12, MCS), Depressive symptoms (CES-D4) and Perceived Stress (PSS)
